30 **Abstract**

31 Training can improve motor skills and modify neural activity at rest and during movement  
32 execution. Learning-related modulations may also concern motor preparation but the neural  
33 correlates and the potential behavioral relevance of such adjustments remain unclear. In humans,  
34 preparatory processes have been largely investigated using transcranial magnetic stimulation  
35 (TMS) with several studies reporting decreased corticospinal excitability (CSE) relative to a  
36 baseline measure; a phenomenon called preparatory suppression. Here, we investigated the effect  
37 of motor training on preparatory suppression of CSE in humans, as compared to modulatory  
38 changes at rest. We trained participants to initiate quick movements in an instructed-delay reaction  
39 time (RT) task and used TMS to investigate changes in CSE over the practice blocks. Training on  
40 the task speeded up RTs, with no repercussion on error rates. Training also increased baseline CSE  
41 at rest. Most interestingly, we found that motor activity during action preparation did not mirror  
42 the training-related rise in resting CSE. Rather, the degree of preparatory suppression from the  
43 rising baseline strengthened with practice. This training-related change in preparatory suppression  
44 predicted RT gains (but not the changes in baseline CSE): subjects showing a stronger expansion  
45 of preparatory suppression were also those exhibiting larger gains in RTs. Finally, such relationship  
46 between RTs and preparatory suppression was also evident at the single-trial level: RTs were  
47 generally faster in trials where preparatory suppression was deeper. These findings suggest that  
48 training induces changes in motor preparatory processes that are linked to an enhanced ability to  
49 initiate fast movements.

50

51 **New and Noteworthy**

52 Any movement is preceded by a period of preparation, which involves a broad suppression of  
53 the corticospinal pathway, a phenomenon called preparatory suppression. Here, we show that  
54 motor training strengthens preparatory suppression and that this strengthening is associated with  
55 an acceleration of movement initiation. Our findings yield an extension of former work,  
56 highlighting a key role of preparatory suppression in training-driven behavioral improvements.

57 **Keywords:** motor training; action preparation; transcranial magnetic stimulation; motor-evoked  
58 potentials; primary motor cortex; corticospinal excitability; corticospinal suppression, reaction  
59 time.

## 60 1. Introduction

61  
62 Motor training improves the speed and/or accuracy at which movements are selected,  
63 initiated and executed. Significant research has been devoted to unveiling the functional changes  
64 at the basis of such improvements (Krakauer et al. 2019). At the neural level, neuroimaging (*e.g.*,  
65 Wiestler & Diedrichsen, 2013; Wenger et al., 2017; Yokoi & Diedrichsen, 2019) and transcranial  
66 magnetic stimulation (TMS) studies (*e.g.*, Rosenkranz et al., 2007; Reis et al., 2008; Mawase et al.,  
67 2017) have shown that training is accompanied by a plastic reorganization of the motor system,  
68 supporting the formation of new motor memories. Specifically, training amplifies resting motor  
69 activity (*e.g.*, Pascual-Leone et al., 1995; Butefisch et al., 2000; Duque et al., 2008; Galea & Celnik,  
70 2009; Christiansen et al., 2018) and induces learning-specific changes of motor activity during  
71 movement execution (Krakauer et al. 2004; Shmuelof et al. 2014; Steele and Penhune 2010).  
72 Animal studies also show learning-related modulations of motor activity during action preparation  
73 (Makino et al. 2017; Paz et al. 2003; Vyas et al. 2018, 2020) that could reflect an optimization of  
74 preparatory processes with training (Mawase et al. 2018). Yet, the behavioral relevance of the  
75 effects of training on action preparation remain unclear.

76 In humans, the excitability of the motor system can be assessed by applying TMS over  
77 primary motor cortex (M1), eliciting motor-evoked potentials (MEPs), whose amplitude reflects  
78 the excitability of the corticospinal pathway (Derosiere et al. 2020; Derosiere and Duque 2020).  
79 When applied during reaction time (RT) tasks, TMS elicits MEPs that are used to assess  
80 corticospinal excitability (CSE) changes associated with action preparation and initiation. CSE is  
81 often suppressed during action preparation when compared to a baseline, measured at rest. The  
82 function of this preparatory suppression (or inhibition) remains unclear (*e.g.*, Greenhouse et al.,  
83 2015; Duque et al., 2017; Derosiere, 2018; Hannah et al., 2018). A prominent view is that it assists  
84 action selection processes, by preventing the release of premature or incorrect responses (Duque et  
85 al. 2010; Quoilin et al. 2018). Indeed, the amount of preparatory suppression was shown to scale  
86 with the complexity of selection processes (Duque et al. 2016; Klein et al. 2014). Another  
87 hypothesis is that preparatory suppression eases action initiation (Greenhouse et al. 2015;  
88 Hasegawa et al. 2017). In this line, a study showed a dependence of RTs on the amount of  
89 preparatory suppression on a single-trial basis: the stronger the suppression, the faster the initiation  
90 of the ensuing movement (Hannah et al. 2018). Importantly, these hypotheses could be both valid

91 as they focus on different levels of control, which are both known to shape motor activity: while  
92 the choice hypothesis suggests that suppression originates from processes that help select accurate  
93 actions (*i.e.*, therefore reducing the error rate), the motor hypothesis entails that preparatory  
94 suppression is also generated by processes speeding up action initiation (*i.e.*, therefore reducing  
95 RTs).

96 Here, we investigated the impact of motor training on preparatory suppression, while  
97 subjects practiced an instructed-delay RT task. The choice aspects were clear-cut, as evident from  
98 the low error rates, even before training. Hence, in such task, the selection requirements are so low  
99 that there is no room for improvement; subjects can only become more skilled at the motor level,  
100 by initiating their action faster. Based on this, we predicted that RTs would decrease over the course  
101 of practice but that error rates would remain marginal. In addition, we expected resting CSE to  
102 increase with training, in accordance with previous work (Butefisch et al. 2000; Christiansen et al.  
103 2018; Duque et al. 2008; Galea and Celnik 2009; Pascual-Leone et al. 1995). Based on the motor  
104 hypothesis (*i.e.*, that preparatory suppression fastens RTs), we expected that training would deepen  
105 the drop in excitability during action preparation with respect to rest, reflecting an increased  
106 preparatory suppression. Hence, we predicted that preparatory activity would not follow the  
107 training-related rise in resting CSE.

## 108 2. Materials and Methods

109

### 110 2.1. Participants

111 Fifteen right-handed healthy subjects participated in the present study (n=15; 10 women;  
112 22.4±1.63 years old). Handedness was assessed via Edinburgh Handedness inventory (Oldfield  
113 1971). Participants filled out a TMS safety questionnaire to look for any contra-indication and gave  
114 written informed consent in accordance with the Ethics Committee of the Université Catholique de  
115 Louvain and the principles of the Declaration of Helsinki. We had to exclude one subject because  
116 we encountered a technical problem during the experiment; hence, analyses were run on the  
117 fourteen remaining subjects. Part of the data reported here has been exploited in a separate study  
118 (Vassiliadis et al. 2018). All of the data are expressed as mean±SE.

119

### 120 2.2. Task

121 Subjects were sited in front of a computer screen with the hands on response devices  
122 (**Fig.1A**, (Quoilin et al., 2016, 2018, 2019; Grandjean et al., 2019). They performed an instructed-  
123 delay RT task, which required them to choose between abduction movements of the left or right  
124 index finger according to the position of a preparatory cue (*i.e.*, a left- or right-sided ball separated  
125 from a goal by a gap). Participants had to prepare their movement once the ball appeared but to  
126 withhold responding until the onset of a “Go” signal (*i.e.*, a bridge). When the bridge appeared on  
127 the screen, subjects had to respond as fast as possible, allowing the ball to roll on the bridge and to  
128 reach the goal. To reduce anticipation of the “Go” signal, the bridge did not appear in some of the  
129 trials (5%). Trials always ended with a feedback score reflecting performance (see **Fig.1B**).

130

### 131 2.3 TMS Protocol

132 Monophasic pulses were delivered through one or two figure-of-eight shaped coils, each  
133 connected either to a Magstim 200<sup>2</sup> magnetic stimulator (Magstim, Whitland, Dyfed, UK) or a  
134 Magstim Bistim<sup>2</sup> magnetic stimulator. The TMS machine used to stimulate each hemisphere was  
135 counterbalanced between subjects. Pulses could be triggered in one (*i.e.*, single-coil TMS) or in the  
136 two coils (*i.e.*, double-coil TMS, **Fig.1C**) because the dataset was initially acquired for a separate  
137 study to establish the reliability of double-coil TMS to probe CSE bilaterally (Grandjean et al.

138 2018; Vassiliadis et al. 2018). Here, MEPs are considered regardless of the protocol used to elicit  
139 them.

140 Each TMS coil was placed tangentially over one M1 with the handle pointing backward  
141 and laterally at a 45° angle away from the midline (**Fig.1C**). TMS was applied over the hotspot of  
142 the first dorsal interosseous muscle (FDI), which was the prime-mover in our task (Duque et al.,  
143 2014; Derosiere et al., 2017a, 2017b). The resting Motor Threshold (rMT) was determined for each  
144 M1. It was defined as the minimal intensity required to evoke MEPs of 50 $\mu$ V at rest in at least 5  
145 out of 10 stimulations. The rMTs equalled 41.7 $\pm$ 5.05% and 40.8 $\pm$ 6.39% of the maximum  
146 stimulator output for the left and the right FDI, respectively. For each hemisphere, the intensity  
147 used throughout the experiment was set at 115% of the individual rMT (Derosiere et al. 2019).

148

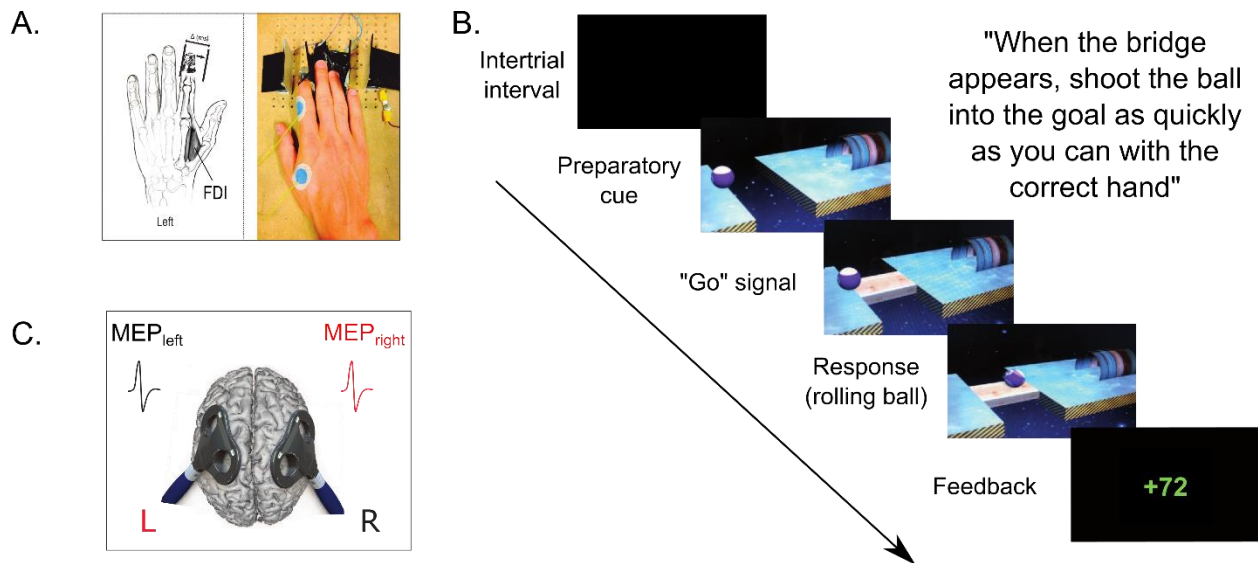

149 **Figure 1. A, The response device.** Index finger responses were recorded using a home-made  
150 device composed of two pairs of metal edges fixed on a wooden platform and positioned under the  
151 left (graphic representation) and right (photographic representation) hands. **B, "Rolling Ball" task.**  
152 Subjects were asked to choose between responding with the left or right index finger according to  
153 the position of a ball (Preparatory cue) appearing on the left or right part of the screen (left in the  
154 current example). They had to wait until the onset of a bridge (Go signal) to release their response  
155 as quickly as possible. The ball then rolled on the bridge (when the subjects answered correctly) to  
156 reach a goal located on the other side of the gap. A feedback reflecting how fast and accurate the  
157 subjects were concluded each trial. On correct trials, scores ranged from 1 to 100 points and were  
158 displayed in green. Participants were informed that the score was inversely proportional to the RT:  
159

160 the faster the response, the higher the score. In order to homogenize the score across subjects,  
161 scores on correct trials were individualized according to RTs measured during a familiarization  
162 session just before the main experiment (Vassiliadis et al., 2018; Grandjean et al., 2019). Incorrect  
163 responses were penalized with negative scores displayed in red. They involved responses occurring  
164 too early (RT<100 ms), referred to as “anticipation errors” (-75 points), responses occurring too  
165 late (RT>500 ms), referred to as “time-out errors” (-50 points), responses provided with the  
166 incorrect hand (-20 points), referred to as “choice errors” and responses provided on catch trials (-  
167 12 points), referred as “catch errors”. When subjects succeeded not to respond on a catch trial, they  
168 were rewarded by +12 points. The total score was displayed at the end of each block. **C, TMS**  
169 **protocol.** Two figure-eight-shaped coils were placed over the subject’s M1, eliciting MEPs in the  
170 left and/or right FDI. In double-coil trials, a 1-ms interval separated the onset of the two pulses,  
171 eliciting MEPs in both hands at a near simultaneous time (Algoet et al. 2018; Grandjean et al. 2018;  
172 Quoilin et al. 2019; Vassiliadis et al. 2018). This interval was used to avoid direct electromagnetic  
173 interference between the two coils (Cincotta et al. 2005), while preventing transcallosal interactions  
174 that would occur between motor areas with longer delays (Ferber et al. 1992; Hanajima et al.  
175 2001). Notably, in double-coil trials, half of the trials involved a pulse over left M1 first whereas  
176 the other half involved a pulse over right M1 first (1ms delay). These data were assembled because  
177 the a prior analysis reported elsewhere showed that the order of stimulation does not influence the  
178 double-coil MEP amplitudes, which were identical to single-coil MEPs (Vassiliadis et al. 2018).

179

## 180 **2.4 Experimental procedure**

181 The experiment started with two familiarization blocks. The first block allowed subjects to  
182 become acquainted with the task. The second block involved TMS and served to compute the  
183 median RT for each subject. The latter was used to individualize the feedback scores on correct  
184 trials according to the initial performance (see **Fig.1B**).

185 Then, subjects performed 400 trials of the task, divided in 10 blocks. Each block involved  
186 an equal combination of single- and double-coil stimulations, occurring in a random order (*i.e.*,  
187 subjects could not anticipate the type of stimulation they would face). Given that both techniques  
188 produce equivalent MEPs (Grandjean et al. 2018; Vassiliadis et al. 2018), these data were  
189 considered regardless of the protocol used to elicit them.



190 TMS could occur in three different settings. First, some TMS pulses were delivered outside  
191 the blocks ( $TMS_{\text{baseline-out}}$ ), providing MEPs reflecting baseline CSE at complete rest.  $TMS_{\text{baseline-}}$   
192  $_{\text{out}}$  pulses occurred every other block, starting before block 1 and ending after block 8 (5 time points;  
193 30 MEPs per time point; **Fig.2A**). Second, TMS occurred during the intertrial interval, 300 ms  
194 before the beginning of the trial (**Fig.2B**). MEPs recorded at this time (12 per block) provided  
195 another baseline measure of CSE, with subjects at rest but engaged in the task ( $TMS_{\text{baseline-in}}$   
196 Labruna et al., 2011). Finally, TMS occurred at 900 or 950 ms after the onset of the preparatory  
197 cue ( $TMS_{\text{preparation}}$ ). Since no difference was found between MEPs recorded at these two timings in  
198 our previous analysis (Vassiliadis et al. 2018), these data were pooled together (48 MEPs per  
199 block). Half of these MEPs fell in left response trials, while the other half occurred in right response  
200 trials. Hence, MEPs could either fall in a hand that was selected for the forthcoming response  
201 ( $MEP_{\text{selected}}$ ; e.g., left MEPs preceding a left index finger response) or in a hand that was non-  
202 selected ( $MEP_{\text{non-selected}}$ ).

203

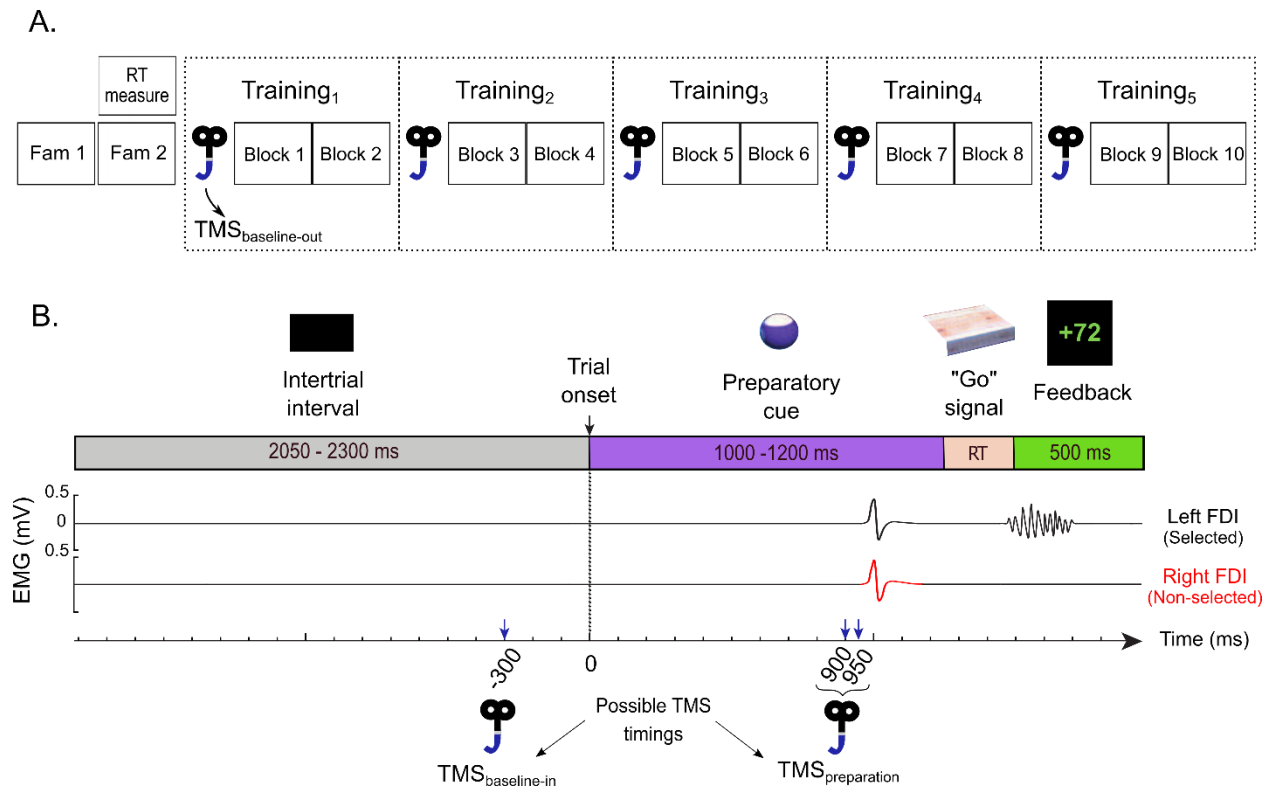

204

205 **Figure 2. A, Time-course of the experiment.** After two familiarization blocks (Fam1: 20 trials  
206 without TMS and Fam 2: 40 trials with TMS), subjects executed ten blocks of forty trials during

207 which MEPs were elicited at TMS<sub>baseline-in</sub> or TMS<sub>preparation</sub> (see 2A). The effect of training was  
208 assessed by comparing five sets of data (Training<sub>1</sub> to Training<sub>5</sub>), each involving MEPs pooled over  
209 two consecutive blocks. MEPs were also elicited outside the blocks (TMS<sub>baseline-out</sub>) at five points  
210 in time, before block 1 and after blocks 2, 4, 6 and 8, categorized as Training<sub>1</sub> to Training<sub>5</sub>, similar  
211 to the MEPs elicited during the blocks. We obtained 15 TMS<sub>baseline-out</sub> MEPs per hand for each  
212 Training<sub>STAGE</sub>. Comparing these data sets allowed us to consider potential training-related changes  
213 in resting CSE outside the context of the task. **B, Time course of a trial.** Trials were separated by  
214 a blank screen (intertrial interval; 2050 to 2300 ms) and always started with a preparatory cue  
215 appearing for a variable delay period (1000 to 1200 ms). Then, a Go signal was presented and  
216 remained on the screen until a response was detected, hence for the duration of the reaction time  
217 (RT). The feedback was presented at the end of each trial for 500 ms and depended on the RT on  
218 correct trials. Importantly, the variable delays in the task were sampled from uniform distributions  
219 to induce temporal uncertainty and therefore reduce anticipation that could emerge with the  
220 repetition of trials. TMS pulses occurred either during the intertrial interval (300 ms before the  
221 beginning of the trial; TMS<sub>baseline-in</sub>), or during the delay period (900 or 950 ms after the preparatory  
222 cue onset, timings pooled; TMS<sub>preparation</sub>). In double-coil trials, motor-evoked potentials (MEPs)  
223 were elicited in the first dorsal interosseous (FDI) of both hands at a near simultaneous time (1 ms  
224 delay); in single-coil trials, MEPs were elicited in the left or right hand. The figure displays a left  
225 hand trial with double-coil TMS at TMS<sub>preparation</sub>.

226

## 227 **2.5 Data processing and statistical analyses**

228 The purpose of the study was twofold: (1) to characterize changes in CSE at rest and during  
229 action preparation occurring along with training in a basic instructed-delay RT task, (2) to assess  
230 whether modulations in CSE were correlated to training-related improvements in RTs. To do so,  
231 the behavioral and MEP data were evaluated according to the block within which they were elicited  
232 and data from two consecutive blocks were pooled together. Given the 10 blocks, we obtained five  
233 data sets reflecting five training stages (Training<sub>STAGE</sub>: Training<sub>1</sub> to Training<sub>5</sub>; **Fig.2A**).

234 Statistical analyses were carried out with Matlab 2018a (the Mathworks, Natick,  
235 Massachusetts, USA) and Statistica 10 (StatSoft Inc., Tulsa, Oklahoma, USA). All data were  
236 systematically tested for the sphericity assumption using Maunchley's tests. The Greenhouse–

237 Geisser (GG) correction was used for sphericity when necessary. Post-hocs comparisons were  
238 always conducted using the Fisher's LSD procedure. The significance level was set at  $p \leq 0.05$ .

239

### 240 **2.5.1 RTs and errors**

241 Left and right hand RTs were computed as the difference between the onset of the Go signal  
242 and movement onset (when the finger quitted the outer metal edge of the device). Trials where  
243 subjects made an error were removed from the data set for the RT analysis. An average of 35 left  
244 and 34 right response trials remained for each subject at each Training<sub>STAGE</sub>. We computed the  
245 mean RT for left and right responses separately and then averaged these data together. Besides, we  
246 also assessed response accuracy over training, by computing, for each Training<sub>STAGE</sub>, the amount  
247 of anticipation, time-out and catch errors as well as the total error rate. For each of these variables,  
248 we expressed the number of incorrect trials in percentage of the total amount of trials, regardless  
249 of the responding hand. Choice errors were not analysed because they were rare (4 choice errors  
250 across all subjects). For the statistical analysis of RTs and errors (*i.e.*, anticipation, time-out, catch  
251 and global errors), we used one-way analyses of variance for repeated measures (ANOVA<sub>RM</sub>) with  
252 the factor Training<sub>STAGE</sub> (Training<sub>1</sub> to Training<sub>5</sub>).

253

### 254 **2.5.2 MEP amplitudes**

255 MEPs were obtained by recording electromyography (EMG) bilaterally from surface  
256 electrodes (Neuroline, Medicotest, Oelstykke, Denmark) placed over the FDI. The signals were  
257 amplified (x1000), bandpass filtered (10-500Hz; NeuroloLog; Digitimer), digitalized at 2000 Hz  
258 and collected with Signal (Signal 3.0, Cambridge, UK) for offline analysis. Trials with background  
259 EMG activity preceding the pulse exceeding 3 SDs above the mean were discarded (1.68±0.30%  
260 removal; Vassiliadis et al., 2018; Grandjean et al., 2018, 2019). This was done to prevent  
261 contamination of the MEP measurements by significant fluctuations in background EMG.

262 To assess training-related changes in resting CSE based on MEPs elicited at TMS<sub>baseline-out</sub>  
263 and TMS<sub>baseline-in</sub>, we averaged separately left and right hand MEPs for each Training<sub>STAGE</sub> before  
264 computing the mean of these averages. These data were analysed using a two-way ANOVA<sub>RM</sub> with  
265 TMS<sub>TIMING</sub> (TMS<sub>baseline-out</sub> or TMS<sub>baseline-in</sub>), and Training<sub>STAGE</sub> (Training<sub>1</sub> to Training<sub>5</sub>) as within-  
266 subject factors. To assess training-related changes in preparatory suppression based on MEPs at

267 TMS<sub>preparation</sub> (expressed in percentage of MEPs at TMS<sub>baseline-in</sub>), we first removed the trials in  
268 which subjects made a mistake ( $10.78 \pm 1.81\%$  removal) and then grouped left and right hand MEPs  
269 according to whether they corresponded to a MEP<sub>selected</sub> or MEP<sub>non-selected</sub>. Within these categories,  
270 we averaged the separate means of left and right hand MEPs for each Training<sub>STAGE</sub>. To analyse  
271 these data, we first focused on percentage MEPs at Training<sub>1</sub>, assessing with t-tests (against a  
272 constant value of 100%) the significance of preparatory suppression at the beginning of training.  
273 Then, we analyzed all training stages using a two-way ANOVA<sub>RM</sub> with the factors MEP<sub>SELECTION</sub>  
274 (MEP<sub>selected</sub> or MEP<sub>non-selected</sub>) and Training<sub>STAGE</sub> (Training<sub>1</sub>, to Training<sub>5</sub>). This ANOVA was also  
275 run on absolute MEP amplitudes (in mV).

276

### 277 **2.5.3 Relationship between training-related changes in RTs and CSE**

278 As described in the Result section, training influenced RTs and CSE. We studied the  
279 relationship between changes at these two levels, with CSE considered separately at rest and during  
280 action preparation. We computed ratios reflecting training-related changes. Based on the RT data,  
281 we realized that the subjects' behavior improved substantially during the first practice stage  
282 (Training<sub>1</sub> to Training<sub>3</sub>) but then, RTs remained quite stable (from Training<sub>3</sub> to Training<sub>5</sub>; Result  
283 section). For this reason, we considered ratios for these two phases of training separately, providing  
284 us with an indication of early (Training<sub>ratio-early</sub>: Training<sub>3</sub>/Training<sub>1</sub>) and late (Training<sub>ratio-late</sub>:  
285 Training<sub>5</sub>/Training<sub>3</sub>) training-related changes in RTs and CSE. For the latter, we computed separate  
286 ratios for MEPs at TMS<sub>baseline-out</sub>, TMS<sub>baseline-in</sub> and TMS<sub>preparation</sub> (expressed in percentage of MEPs  
287 at TMS<sub>baseline-in</sub>). We then examined the correlation between the RT and MEP Training<sub>ratios</sub> by using  
288 least squares linear regressions.

289 Finally, we compared the strength of the RT relationship to training-related changes in MEP  
290 amplitudes at TMS<sub>baseline-in</sub> (reflecting resting CSE) and changes in percentage MEPs at  
291 TMS<sub>preparation</sub> (reflecting preparatory suppression of CSE). To do so, in order to obtain a robust  
292 estimate of the absolute Pearson's R, we ran a bootstrap analysis with 10000 resamples and  
293 calculated a median R for each correlation (Efron 1979). These R-values were then compared to  
294 each other using Pearson and Fillon's z test (Pearson and Filon 1898).

295

#### 296 **2.5.4 Single-trial relationship between RTs and preparatory suppression**

297 The correlation analyses revealed a relationship between RTs and preparatory suppression:  
298 the subjects who showed the greatest training-related reduction in RTs were also those who  
299 displayed the strongest deepening in preparatory suppression (see Result section). To better  
300 understand the dependency of RTs to the strength of preparatory suppression, we investigated  
301 whether this relationship was evident on a single-trial basis, as suggested previously (Hannah et al.  
302 2018). We selected the MEPs elicited at  $TMS_{\text{preparation}}$  and again, expressed them as a percentage of  
303  $TMS_{\text{baseline-in}}$ . We only used the double-coil trials, to consider a homogeneous set of data, with  
304 preparatory MEPs falling in both hands systematically. For each trial, we extracted the RT, as well  
305 as the MEPs recorded at  $TMS_{\text{preparation}}$  in both selected ( $MEP_{\text{selected}}$ ) and non-selected ( $MEP_{\text{non-}}$   
306  $\text{selected}$ ) hands. Hence, for each trial, we obtained one RT measure linked to two different MEPs.

307 To examine the relationship between RTs and preparatory suppression, we pooled the trials  
308 from all 10 blocks together and sorted them according to the amplitude of MEPs within each trial.  
309 Given that there were two MEPs in each trial, we repeated this procedure twice, providing us with  
310 two different orderings of the trials according to the  $MEP_{\text{selected}}$  or  $MEP_{\text{non-selected}}$ . Within each  
311 arrangement, trials were grouped into 6 consecutive percentile bins ( $MEP_{\text{BIN}}$ :  $MEP_{\text{BIN-1}} = 0$  to  
312 16.7%,  $MEP_{\text{BIN-2}} = 16.7$  to 33.3% ...  $MEP_{\text{BIN-6}} = 83.3$  to 100% of the data).  $MEP_{\text{BIN-1}}$  contained  
313 the trials with the stronger preparatory suppression whereas the  $MEP_{\text{BIN-6}}$  included the trials with  
314 the weaker preparatory suppression. We then computed the mean RT of trials within each  $MEP_{\text{BIN}}$   
315 (23 trials per condition on average and never less than 19 trials), and then averaged the  
316 corresponding RTs. Hence, we obtained six average RT values (*i.e.*, one for each  $MEP_{\text{BIN}}$ ) for each  
317 of the trial arrangements based on the two MEP types. These two sets of RT data were analysed  
318 using two separate  $ANOVA_{\text{RM}}$  with the factor  $MEP_{\text{BIN}}$  ( $MEP_{\text{BIN-1}}$  to  $MEP_{\text{BIN-6}}$ ).

### 319 3. Results

320

#### 321 3.1. RTs and errors

322 **Fig.3A** shows the evolution of RTs with training. The ANOVA<sub>RM</sub> revealed a significant  
323 influence of Training<sub>STAGE</sub> on RT ( $F_{(4,52)}=4.31$ ,  $p=0.0043$ ). Post-hoc tests showed that RTs  
324 measured from Training<sub>3</sub> to Training<sub>5</sub> were shorter than at Training<sub>1</sub> (all  $p<0.004$ ). In contrast, the  
325 total error rate remained stable over the blocks ( $F_{(4,52)}=0.82$ ,  $p=0.52$ , **Fig.3B**). We did not observe  
326 any modification of the percentage of anticipation ( $F_{(4,52)}=1.12$ ,  $p=0.36$ ), time-out (GG-corrected  
327  $F_{(2.50,32.50)}=0.90$ ,  $p=0.44$ ) or catch errors ( $F_{(4,52)}=1.73$ ,  $p=0.16$ ). Hence, training enabled subjects to  
328 respond more quickly while maintaining the same accuracy level.

329

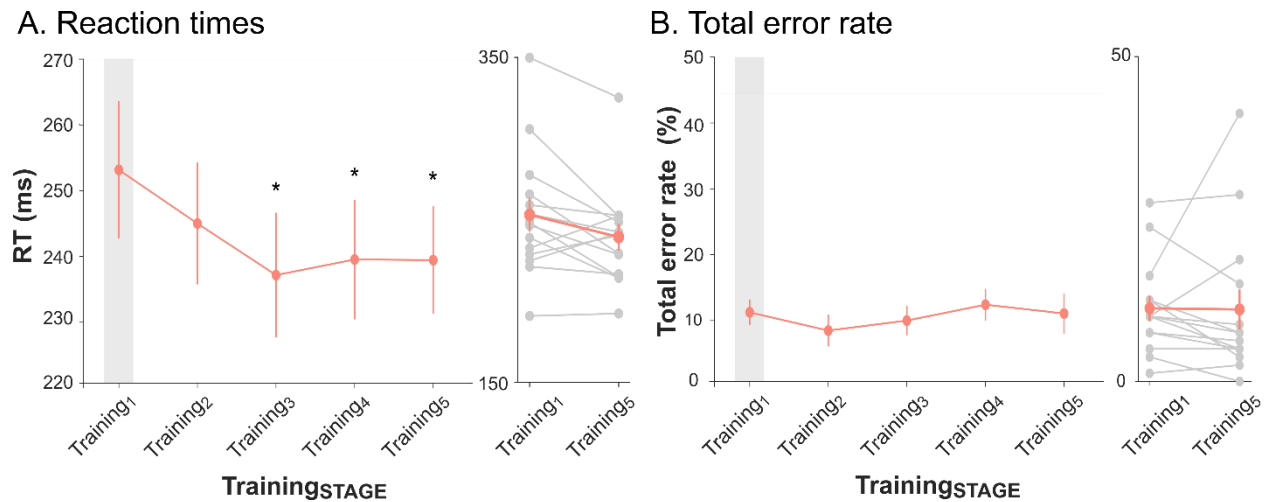

330

331 **Figure 3. Evolution of reaction times (RTs) and total error rate throughout training.** The  
332 mean RTs (**A**, in ms) and total error rate (**B**, in % of all trials) are represented for each  
333 Training<sub>STAGE</sub>, regardless of the responding hand. Stars denote a significant difference between a  
334 given Training<sub>STAGE</sub> and Training<sub>1</sub> ( $p<0.05$ ). Individual data for Training<sub>1</sub> and Training<sub>5</sub>.

335

#### 336 3.2. MEP amplitude

337 First, we evaluated the effect of training on MEPs acquired at rest. As evident on **Fig.4**,  
338 MEPs were larger when assessed in the context of the task ( $TMS_{\text{baseline-in}}: 1.79\pm 0.17\text{mV}$ ) compared  
339 to when subjects were fully at rest ( $TMS_{\text{baseline-out}}: 1.34\pm 0.17\text{mV}$ ), as supported by the significant  
340 factor  $TMS_{\text{TIMING}}$  ( $F_{(1,13)}=28.43$ ,  $p<0.001$ ) and consistent with previous studies (Derosière et al.

341 2015; Labruna et al. 2011). The ANOVA<sub>RM</sub> also revealed an effect of Training<sub>STAGE</sub> on baseline  
342 MEPs ( $F_{(4,52)}=6.34$ ,  $p<0.001$ ). MEPs recorded at Training<sub>2</sub> to Training<sub>5</sub> were larger than at  
343 Training<sub>1</sub> (all  $p<0.03$ ). This training effect on MEPs occurred independently of the TMS<sub>TIMING</sub>:  
344 there was a parallel increase in the amplitude of MEPs elicited at TMS<sub>baseline-out</sub> and TMS<sub>baseline-in</sub>  
345 (Training<sub>STAGE</sub>×TMS<sub>TIMING</sub>:  $F_{(4,52)}=0.18$ ,  $p=0.95$ ).

346

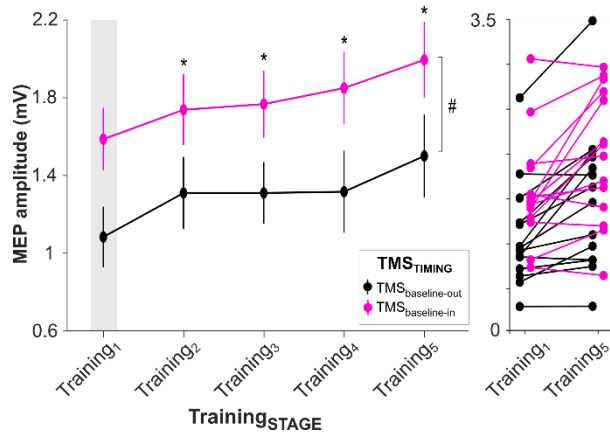

347  
348 **Figure 4. Evolution of baseline MEPs throughout training.** MEP amplitudes (in mV) elicited at  
349 TMS<sub>baseline-out</sub> (black) and TMS<sub>baseline-in</sub> (pink) at the different Training<sub>STAGES</sub>. Hash signs indicate a  
350 TMS<sub>TIMING</sub> effect. Stars denote a significant difference between a given Training<sub>STAGE</sub> and  
351 Training<sub>1</sub> ( $p<0.05$ ). Individual data for Training<sub>1</sub> and Training<sub>5</sub> are also displayed.

352  
353 Second, we analyzed the effect of training on preparatory suppression by considering MEPs  
354 elicited at TMS<sub>preparation</sub> (expressed in percentage of TMS<sub>baseline-in</sub>). As evident on **Fig.5A**,  
355 percentage FDI MEPs were initially suppressed at Training<sub>1</sub> (MEPs smaller than 100%), consistent  
356 with the presence of preparatory suppression in the prime-mover, whether selected for the  
357 forthcoming response (MEP<sub>selected</sub>:  $73.98\pm 4.00\%$ ;  $t_{(13)}=-6.50$ ,  $p<0.0001$ ) or not (MEP<sub>non-selected</sub>:  
358  $76.26\pm 4.36\%$ ;  $t_{(13)}=-5.44$ ,  $p<0.001$ ). Interestingly, preparatory suppression became more  
359 prominent with training: the ANOVA<sub>RM</sub> revealed a significant decrease in percentage MEP  
360 amplitudes over the Training<sub>STAGES</sub> ( $F_{(4,52)}=2.79$ ,  $p=0.036$ ). This change was marginal at Training<sub>4</sub>  
361 (*i.e.*, Training<sub>4</sub>:  $p=0.058$  when compared to Training<sub>1</sub>) and became significant at Training<sub>5</sub>  
362 ( $p=0.006$ ). It concerned MEPs obtained from the selected and non-selected hands  
363 (Training<sub>STAGE</sub>×MEP<sub>SELECTION</sub>:  $F_{(4,52)}=0.56$ ,  $p=0.70$ ). To further our understanding of training-



364 related changes of preparatory activity, we ran another set of ANOVA<sub>RM</sub> on absolute MEP  
365 amplitudes (rather than percentages) at TMS<sub>preparation</sub> (**Fig.5B**). These MEPs did not show any  
366 fluctuation over the Training<sub>STAGES</sub> ( $F_{(4,52)}=1.30$ ,  $p=0.28$ ). Moreover, we did not find any  
367 MEP<sub>SELECTION</sub> effect ( $F_{(1,13)}=1.69$ ,  $p=0.22$ ) or Training<sub>STAGE</sub> $\times$ MEP<sub>SELECTION</sub> interaction  
368 ( $F_{(4,52)}=0.85$ ,  $p=0.50$ ).

369 In conclusion, our results indicate that training did not produce even modulatory changes  
370 in motor activity at rest and during action preparation: while resting CSE increased, preparatory  
371 activity remained flat over the blocks, thus revealing an augmenting drop (*i.e.*, preparatory  
372 suppression) with respect to the rising baseline excitability state. These changes in CSE occurred  
373 in parallel with an acceleration of RTs.

374

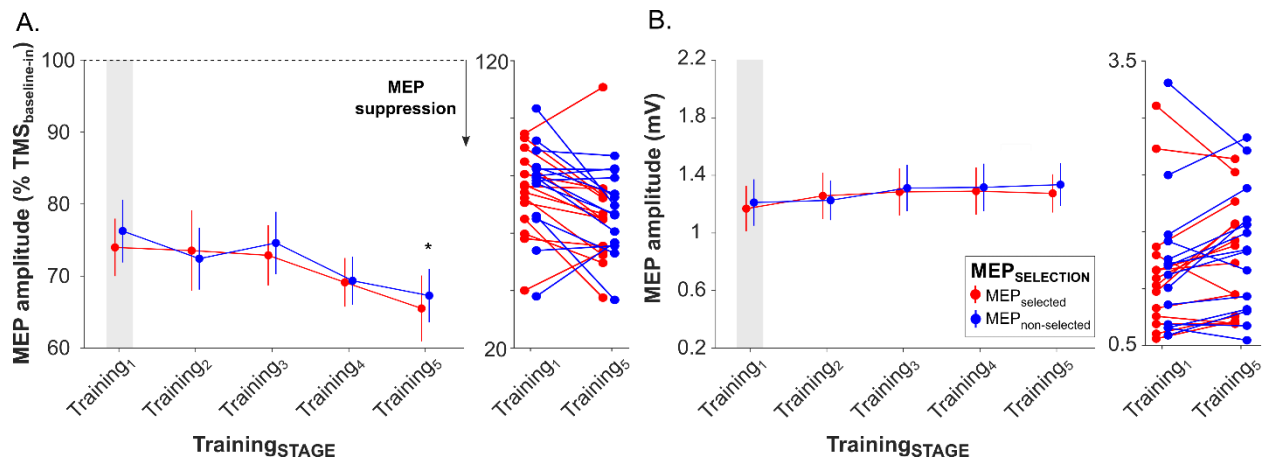

375 **Figure 5. Evolution of preparatory MEPs throughout training.** Normalized MEP amplitudes  
376 recorded at TMS<sub>preparation</sub> (in percentage of MEPs elicited at TMS<sub>baseline-in</sub>) muscles at the different  
377 Training<sub>STAGES</sub> (**A**). Absolute MEP data (in mV) are also represented muscles (**B**). The star denotes  
378 a significant difference between a Training<sub>5</sub> and Training<sub>1</sub> ( $p<0.05$ ). Note that the change in  
379 preparatory suppression was close to significance at Training<sub>4</sub> (*i.e.*,  $p=0.058$  when compared to  
380 Training<sub>1</sub>). Individual data for Training<sub>1</sub> and Training<sub>5</sub> are also displayed.

382  
383 Because RTs became shorter over the blocks, one may argue that MEPs at TMS<sub>preparation</sub>  
384 were not recorded in a comparable preparatory state throughout training; that is, the delay between  
385 TMS and movement onset (Delay<sub>TMS-TO-MOVE</sub>) may have decreased over the blocks. Importantly,  
386 we shuffled the delay between the pulse and the Go signal in the present study (see Methods), in



387 order to prevent changes in RT to convert into equivalent changes in the  $\text{Delay}_{\text{TMS-TO-MOVE}}$ .  
388 However, because TMS fell on average closer to movement onset at  $\text{Training}_5$  ( $399.70 \pm 8.48\text{ms}$ )  
389 than  $\text{Training}_1$  ( $419.99 \pm 9.99\text{ms}$ ,  $t_{(13)} = -3.10$ ,  $p = 0.008$ ), we performed an additional analysis to  
390 control for a potential bias of the  $\text{Delay}_{\text{TMS-TO-MOVE}}$ . We conducted a response-locked analysis  
391 whereby we classified MEP data at  $\text{TMS}_{\text{preparation}}$  (regardless of the  $\text{Training}_{\text{STAGE}}$ ) according to the  
392  $\text{Delay}_{\text{TMS-TO-MOVE}}$  in 5 consecutive bins of trials ( $\text{Delay}_{\text{BIN}} = \text{Delay}_{\text{BIN-1}} = 0$  to 20%,  $\text{Delay}_{\text{BIN-2}} = 20$   
393 to 40%, ...,  $\text{Delay}_{\text{BIN-5}} = 80$  to 100% of the  $\text{Delay}_{\text{TMS-TO-MOVE}}$  data). An  $\text{ANOVA}_{\text{RM}}$  ran on these  
394 data did not reveal any effect of  $\text{Delay}_{\text{BIN}}$  ( $F_{(4,52)} = 1.45$ ;  $p = 0.23$ ), nor was there any significant  
395  $\text{MEP}_{\text{SELECTION}} \times \text{Delay}_{\text{BIN}}$  interaction ( $F_{(4,52)} = 0.40$ ;  $p = 0.81$ ; **Fig.6**). These results indicate that MEPs  
396 elicited preceding a Go signal remain quite unaffected by the delay separating the  $\text{TMS}_{\text{preparation}}$   
397 pulse and movement onset.

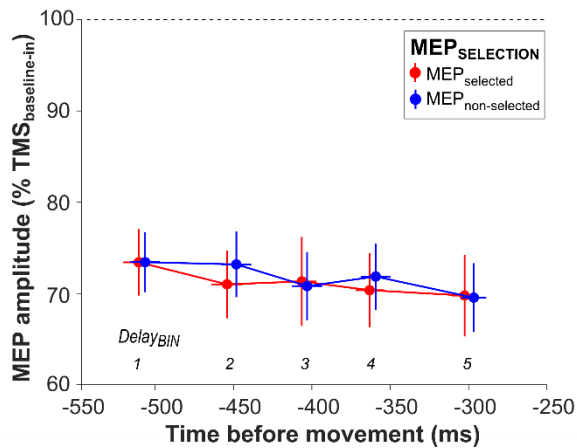

398  
399 **Figure 6. Preparatory suppression according to time before movement onset.** MEP amplitudes  
400 recorded at  $\text{TMS}_{\text{preparation}}$  (in percentage of MEPs elicited at  $\text{TMS}_{\text{baseline-in}}$ ) are represented for each  
401  $\text{Delay}_{\text{BIN}}$  in a selected (red) or non-selected (blue) muscle.

402

### 403 3.3 Relationship between training-related changes in RTs and CSE

404 Given that training influenced RTs and CSE, we studied the relationship between changes  
405 at these two levels, with CSE considered separately at rest and during action preparation. To assess  
406 the relationship between RTs and resting CSE, we ran correlations between training-related  
407 changes in RTs and changes in MEPs at  $\text{TMS}_{\text{baseline-in}}$  and  $\text{TMS}_{\text{baseline-out}}$ . These analyses did not  
408 reveal any link between variations in resting measures of CSE and changes observed in RTs, neither

409 at Training<sub>ratio-early</sub> (**Fig.7A**,  $R=-0.27$ ,  $p=0.36$  and  $R=0.079$ ,  $p=0.79$  for TMS<sub>baseline-in</sub> and TMS<sub>baseline-</sub>  
410 out, respectively) nor at Training<sub>ratio-late</sub> ( $R=-0.28$ ,  $p=0.33$  and  $R=-0.16$ ,  $p=0.59$ ).

411 In contrast, changes in RTs at Training<sub>ratio-early</sub> were linked to variations in preparatory  
412 suppression observed in the selected (**Fig.7B**;  $R=0.55$ ,  $p=0.043$ ) and non-selected FDI (**Fig.7C**;  
413  $R=0.74$ ,  $p=0.0027$ ): subjects showing a greater training-related strengthening of preparatory  
414 suppression also showed larger improvements in RTs. This correlation was not significant at  
415 Training<sub>ratio-late</sub>, neither for the selected ( $R=0.12$ ,  $p=0.67$ ) nor for the non-selected effectors  
416 ( $R=0.48$ ,  $p=0.084$ ). Our results suggest that RT improvements were related to early changes in  
417 preparatory suppression.

418 This conclusion is further supported by an additional analysis showing that the strength of  
419 the correlation between RTs and CSE at Training<sub>ratio-early</sub> was significantly higher when considering  
420 percentage MEPs at TMS<sub>preparation</sub> (*i.e.*, preparatory suppression) in the non-selected FDI (bootstrap  
421 estimate of absolute  $R=0.76$ ), than when MEPs were considered at TMS<sub>baseline-in</sub> ( $R=0.29$ ;  $z=1.75$ ;  
422  $p=0.040$ , **Fig.7D**). This difference was not significant when taking preparatory suppression in the  
423 selected FDI ( $R=0.56$ ;  $z$ -score= $0.85$ ,  $p=0.20$ ). Hence, training-related changes in preparatory  
424 suppression of the non-selected effector turned out to be the best predictor of RT improvements.

425

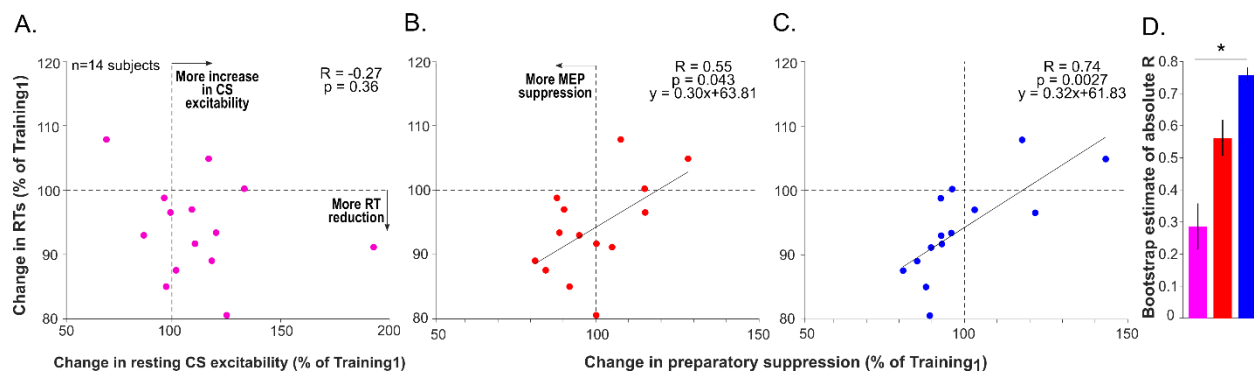

426  
427 **Figure 7. Correlation between early training-related changes in RTs and CSE.** Changes in  
428 RTs as a function of changes in MEP amplitudes at TMS<sub>baseline-in</sub> (reflecting resting CSE, **A**) and  
429 changes in percentage MEPs at TMS<sub>preparation</sub> (reflecting preparatory suppression of CSE) in the  
430 selected (**B**) and non-selected FDI muscle (**C**) during the early Training<sub>stage</sub>. For this analysis,  
431 changes in RTs and MEPs were assessed by computing percentage ratios between the values  
432 obtained at Training<sub>3</sub> and Training<sub>1</sub>. (**D**) Bootstrap estimates of absolute R values are also displayed

433 ( $\pm$  standard deviation of the samples) for each condition. These R values were compared by means  
434 of a Pearson and Fillon's z test. One tail p-values were used given our a priori hypothesis  
435 concerning the directionality of the effect ( $p < 0.05$ ).

436

### 437 3.4 Single-trial relationship between RTs and preparatory suppression

438 Finally, we asked whether the dependency of RTs to preparatory suppression is also evident  
439 on a single-trial basis. This was the case for MEPs recorded from the non-selected hand: the greater  
440 the preparatory suppression in that hand, the shorter the following RT (**Fig.8**, right panel), as  
441 supported by the ANOVA<sub>RM</sub> revealing an effect of the factor MEP<sub>BIN</sub> on RTs ( $F_{(5,65)}=2.57$ ,  
442  $p=0.035$ ). Post-hoc tests revealed that RTs in MEP<sub>BIN-1</sub> and MEP<sub>BIN-2</sub> (*i.e.*, strongest preparatory  
443 suppression) were systematically shorter than those in MEP<sub>BIN-6</sub> ( $p=0.0021$  and  $p=0.0090$ ). We did  
444 not observe any relationship between RTs and MEPs obtained in the selected hand (MEP<sub>BIN</sub>: GG-  
445 corrected  $F_{(2,22,28.88)}=0.85$ ,  $p=0.45$ ; **Fig.8**, left panel). Hence, the training-related effects and the  
446 single-trial relationship indicates that preparatory suppression in the non-selected (non-responding)  
447 hand is a predictor of the following RT. The lower this activity, the faster the response.

448

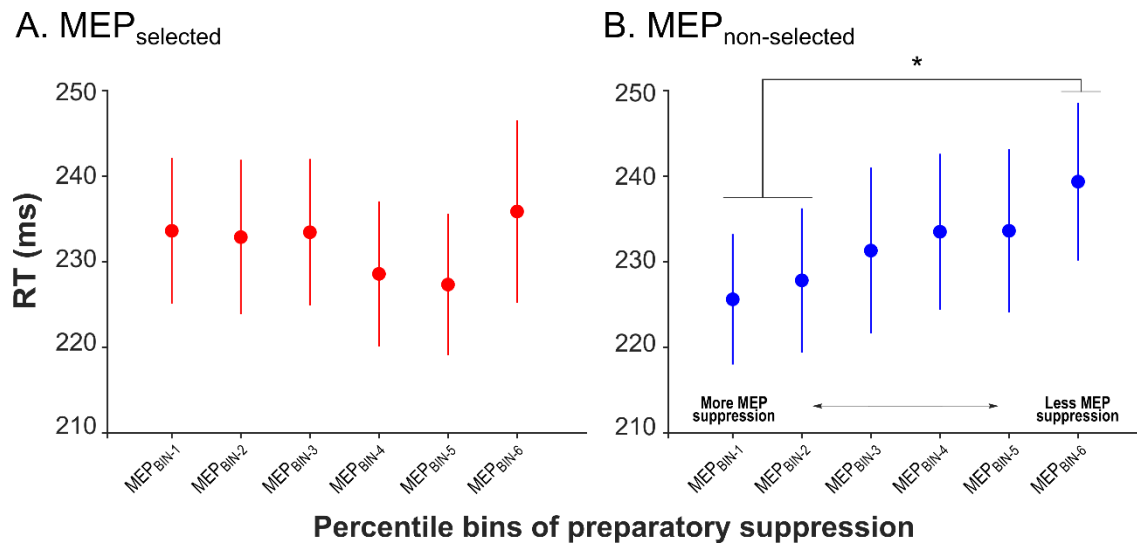

449

450 **Figure 8. Single-trial MEP-RT relationship.** Averaged RTs as a function of the preceding  
451 preparatory suppression in a selected (left panel) or non-selected muscle (right panel). For this  
452 analysis, the MEP data were divided in 6 MEP<sub>BIN</sub> of increasing amplitude and the RTs  
453 corresponding to each MEP<sub>BIN</sub> were averaged. The star denotes a significant difference between  
454 RTs at MEP<sub>BIN-1</sub> and MEP<sub>BIN-2</sub> and RTs at MEP<sub>BIN-6</sub> in the non-selected muscle ( $p < 0.05$ ). Note that

455 there was also a trend for RTs at  $MEP_{BIN-1}$  to be shorter than those in  $MEP_{BIN-4}$  ( $p=0.070$ ) and  
456  $MEP_{BIN-5}$  ( $p=0.066$ ).

#### 457        **4. Discussion**

458

459        Training accelerated RTs while errors remained low. CSE became larger at rest and  
460 preparatory suppression of CSE was stronger after training. Interestingly, subjects who showed the  
461 strongest RT improvements at the early Training<sub>STAGES</sub> were also those displaying the largest initial  
462 strengthening in preparatory suppression, especially when probed in the non-selected hand. Such a  
463 relationship between RTs and preparatory suppression was also evident at a single-trial level: RTs  
464 were generally faster in trials where preparatory suppression was deeper.

465        Subjects responded faster with training. RTs reflect the sum of the time required for  
466 processing the imperative cue, preparing the motor command and initiating the action (Derosiere  
467 et al. 2019; Haith et al. 2016) and, theoretically, training may impact any of these sensory-motor  
468 components. Previous studies have shown that RT improvements can result from both faster  
469 sensory processing (Clark et al. 2015) and more efficient motor preparation (Mawase et al. 2018).  
470 Yet, in an instructed-delay task, the time required for sensory processing and motor preparation is  
471 strongly constrained and most of the RT is assumed to reflect the time needed for action initiation  
472 (Haith et al. 2016). Hence, the RT gains reported here are likely to reflect a reduction in initiation  
473 time. Our findings thus yield an extension of former work, suggesting that, in addition to  
474 accelerating sensory processing and motor preparation, training can also boost action initiation.

475        Resting CSE was higher when assessed in the context of the task (*i.e.*, at TMS<sub>baseline-in</sub>) than  
476 between the blocks (*i.e.*, at TMS<sub>baseline-out</sub>), consistent with previous data (Labruna et al. 2011;  
477 Vassiliadis et al. 2018) and with the observation that task-driven increases in attention amplifies  
478 cortical excitability (Kastner et al. 1998, 1999). As expected based on prior observations (*e.g.*,  
479 (Butefisch et al. 2000; Christiansen et al. 2018; Duque et al. 2008; Galea and Celnik 2009; Pascual-  
480 Leone et al. 1995), practicing the task led to an increase in resting CSE. Interestingly, this increase  
481 was not exclusive to the task and was in fact strongly similar at TMS<sub>baseline-in</sub> and TMS<sub>baseline-out</sub>,  
482 ruling out the possibility that it resulted from a change in task-related attention over practice  
483 (Derosière et al. 2015). Rather, our findings support the idea of a plastic reorganization of the motor  
484 system, measurable when engaged in the task as well as at rest.

485        CSE was reduced during action preparation when compared to baseline (during the task),  
486 reflecting the well-known preparatory suppression effect (Duque et al. 2017), which was evident

487 in the selected and non-selected hands from the beginning of the training. Contrary to rest, the  
488 amplitude of MEPs at TMS<sub>preparation</sub> did not increase with practice (they remained unchanged),  
489 reflecting a strengthening drop in CSE from the rising baseline state. Notably, although at the group  
490 level this reinforcement of preparatory suppression appeared late (**Fig.5A**), at the individual level,  
491 a majority of subjects already exhibited a strengthening of preparatory suppression at early training  
492 stages (**Fig.6**).

493 Based on these findings, one could propose that changes in resting excitability are key to  
494 RT improvements, as suggested by the inverse relationship between baseline CSE and RTs  
495 described recently (Greenhouse et al. 2017). Yet, we did not find a relationship between training-  
496 related changes in baseline excitability and improvements in performance. This is in line with the  
497 idea that increased resting CSE is not crucial for immediate performance (Bologna et al. 2015), but  
498 may be involved in the long-term retention of the motor behavior (Cantarero et al. 2013). Rather,  
499 what was predictive of RT gains in the present study was the change in relative CSE, as measured  
500 during action preparation: subjects showing the strongest reinforcement of preparatory suppression  
501 at the early Training<sub>STAGES</sub> were those who became fastest. These results are consistent with animal  
502 studies showing that behavioral improvements in motor learning tasks are associated with changes  
503 in relative preparatory activity (Mandelblat-Cerf et al. 2009; Paz et al. 2003; Vyas et al. 2018).  
504 Similarly, a recent study using paired-pulse TMS showed that changes in preparatory activity of  
505 M1 intra-cortical circuits are correlated to training-related behavioral gains, contrary to changes  
506 observed at rest (Dupont-Hadwen et al. 2018). More generally, our findings agree with the idea  
507 that efficient action preparation relies on dynamical shifts of neural activity from a baseline state  
508 to a preparatory state (Churchland et al. 2012). From this point of view, training may allow tuning  
509 the dynamics of preparatory activity, bringing it closer to an optimal state for action initiation (Vyas  
510 et al. 2018). In this line, strengthening of preparatory suppression would facilitate action initiation  
511 by allowing excitatory inputs targeting the selected motor representation to better stand out against  
512 a quiescent background (mostly reflected in the excitability of non-selected effector), ultimately  
513 speeding up RTs (Greenhouse et al. 2015; Hasbroucq et al. 1997; Hasegawa et al. 2017).

514 This interpretation was reinforced by our single-trial analysis showing that RTs depended  
515 on the foregoing amount of preparatory suppression. That is, stronger levels of suppression were  
516 related to faster initiation times in the very same trials, in agreement with previous results (Hannah  
517 et al. 2018; Hasegawa et al. 2017). Interestingly, we found such relationship when considering the

518 non-selected prime-mover but not the selected one. This was also the case for training-related  
519 effects, with preparatory suppression in the non-selected effector appearing as the best predictor of  
520 RT changes, possibly because the selected effector is targeted by too many overlapping inputs to  
521 supply as meaningful MEP amplitudes (Duque and Ivry 2009). Overall, our data support the view  
522 that preparatory suppression facilitates rapid motor initiation.

523 **Conclusion**

524           This study shows that a simple training paradigm can lead to improvements in action  
525 initiation that are accompanied by an increase in resting CSE and a strengthening of corticospinal  
526 suppression from the rising baseline state. Moreover, contrary to changes in resting CSE, such  
527 strengthening of preparatory suppression was linked to RTs improvements. These findings could  
528 have implications for the rehabilitation of patients suffering from impaired action initiation such as  
529 in cerebellar ataxia (Battaglia et al. 2006) or Parkinson's disease (Mure et al. 2012).



530 **Additional information**

531 Data availability:

532 The data that support the findings of this study are available at: <https://osf.io/8p5wm/> (Vassiliadis  
533 2020).

534

535 Conflict of interest:

536 The authors declare no conflict of interest.

537

538 Author contributions:

539 PV, GD, JG, JD: conception and design of the work; PV, JG: acquisition of data; PV: analysis of  
540 data; PV, GD, JD interpretation of data; PV: drafting; PV, GD, JG, JD revising the manuscript.

541

542 Funding:

543 P.V. and J.G. were PhD students supported by the Fund for Research training in Industry and  
544 Agriculture (FRIA/FNRS; FC29690 and FC09115). G.D. was a post-doctoral fellow supported by  
545 the Belgian National Funds for Scientific Research (FNRS, 1B134.18). J.D. was supported by  
546 grants from the Belgian FNRS (F.4512.14) and the Fondation Médicale Reine Elisabeth (FMRE).

547 **References**

- 548 **Algoet M, Duque J, Iannetti GD, Mouraux A.** Temporal Profile and Limb-specificity of Phasic  
549 Pain-Evoked Changes in Motor Excitability. *Neuroscience* 386: 240–255, 2018.
- 550 **Battaglia F, Quartarone A, Ghilardi MF, Dattola R, Bagnato S, Rizzo V, Morgante L,**  
551 **Girlanda P.** Unilateral cerebellar stroke disrupts movement preparation and motor imagery. *Clin*  
552 *Neurophysiol* 117: 1009–1016, 2006.
- 553 **Bologna M, Rocchi L, Paparella G, Nardella A, Li P, Conte A, Kojovic M, Rothwell JC,**  
554 **Berardelli A.** Brain Stimulation Reversal of Practice-related Effects on Corticospinal Excitability  
555 has no Immediate Effect on Behavioral Outcome. *Brain Stimul* 8: 603–612, 2015.
- 556 **Butefisch CM, Davis BC, Wise SP, Sawaki L, Kopylev L, Classen J, Cohen LG.** Mechanisms  
557 of use-dependent plasticity in the human motor cortex. *Proc Natl Acad Sci* 97: 3661–3665, 2000.
- 558 **Cantarero G, Lloyd A, Celnik P.** Reversal of Long-Term Potentiation-Like Plasticity Processes  
559 after Motor Learning Disrupts Skill Retention. *J Neurosci* 33: 12862–12869, 2013.
- 560 **Christiansen L, Madsen MJ, Bojsen-møller E, Thomas R, Nielsen JB.** Brain Stimulation  
561 Progressive practice promotes motor learning and repeated transient increases in corticospinal  
562 excitability across multiple days. *Brain Stimul* 11: 346–357, 2018.
- 563 **Churchland MM, Cunningham JP, Kaufman MT, Foster JD, Nuyujukian P, Ryu SI,**  
564 **Shenoy K V., Shenoy K V.** Neural population dynamics during reaching. *Nature* 487: 51–56,  
565 2012.
- 566 **Cincotta M, Borgheresi A, Jung P, Balestrieri F, Giovannelli F, Zaccara G, Ziemann U.**  
567 Physical interactions between induced electrical fields can have substantial effects on neuronal  
568 excitation during simultaneous TMS of two brain areas. *Clin Neurophysiol* 116: 1733–1742,  
569 2005.
- 570 **Clark K, Gregory Appelbaum L, van den Berg B, Mitroff SR, Woldorff MG.** Improvement  
571 in visual search with practice: Mapping learning-related changes in neurocognitive stages of  
572 processing. *J Neurosci* 35: 5351–5359, 2015.
- 573 **Derosiere G.** A Dynamical System Framework for Theorizing Preparatory Inhibition. *J Neurosci*  
574 38: 3391–3393, 2018.
- 575 **Derosière G, Billot M, Ward ET, Perrey S.** Adaptations of motor neural structures' activity to

- 576 lapses in attention. *Cereb Cortex* 25: 66–74, 2015.
- 577 **Derosiere G, Duque J.** Tuning the Corticospinal System: How Distributed Brain Circuits Shape  
578 Human Actions. *Neurosci* 107385841989675, 2020.
- 579 **Derosiere G, Thura D, Cisek P, Duque J.** Motor cortex disruption delays motor processes but  
580 not deliberation about action choices. *J Neurophysiol* 122: 1566–1577, 2019.
- 581 **Derosiere G, Vassiliadis P, Demaret S, Zénon A, Duque J.** Learning stage-dependent effect of  
582 M1 disruption on value-based motor decisions. *Neuroimage* , 2017a.  
583 doi:10.1016/j.neuroimage.2017.08.075.
- 584 **Derosiere G, Vassiliadis P, Duque J.** Advanced TMS approaches to probe corticospinal  
585 excitability during action preparation. *Neuroimage* 213: 116746, 2020.
- 586 **Derosiere G, Zénon A, Alamia A, Duque J.** Primary motor cortex contributes to the  
587 implementation of implicit value-based rules during motor decisions. *Neuroimage* 146: 1115–  
588 1127, 2017b.
- 589 **Dupont-Hadwen J, Bestmann S, Stagg CJ.** Motor training modulates intracortical inhibitory  
590 dynamics in motor cortex during movement preparation. *Brain Stimul* , 2018.  
591 doi:10.1016/j.brs.2018.11.002.
- 592 **Duque J, Greenhouse I, Labruna L, Ivry RB.** Physiological Markers of Motor Inhibition  
593 during Human Behavior. *Trends Neurosci* 40: 219–236, 2017.
- 594 **Duque J, Ivry RB.** Role of corticospinal suppression during motor preparation. *Cereb Cortex* 19:  
595 2013–2024, 2009.
- 596 **Duque J, Labruna L, Cazes C, Ivry RB.** Dissociating the influence of response selection and  
597 task anticipation on corticospinal suppression during response preparation. *Neuropsychologia* 65:  
598 287–296, 2014.
- 599 **Duque J, Lew D, Mazzocchio R, Olivier E, Richard B.** Evidence for two concurrent inhibitory  
600 mechanisms during response preparation. *J Neurosci* 30: 3793–3802, 2010.
- 601 **Duque J, Mazzocchio R, Stefan K, Hummel F, Olivier E, Cohen LG.** Memory formation in  
602 the motor cortex ipsilateral to a training hand. *Cereb Cortex* 18: 1395–1406, 2008.
- 603 **Duque J, Petitjean C, Swinnen SP.** Effect of aging on motor inhibition during action  
604 preparation under sensory conflict. *Front Aging Neurosci* 8: 1–14, 2016.

- 605 **Efron B.** Bootstrap Methods: Another Look at the Jackknife. *Ann Stat* 7: 1–26, 1979.
- 606 **Ferbert A, Priori A, Rothwell JC, Day BL, Colebatch JG, Marsden CD.** Interhemispheric  
607 inhibition of the human motor cortex. *J Physiol* 453: 525–546, 1992.
- 608 **Galea JM, Celnik P.** Brain Polarization Enhances the Formation and Retention of Motor  
609 Memories. *J Neurophysiol* 102: 294–301, 2009.
- 610 **Grandjean J, Derosiere G, Vassiliadis P, Quemener L, Wilde Y de, Duque J.** Towards  
611 assessing corticospinal excitability bilaterally: Validation of a double-coil TMS method. *J*  
612 *Neurosci Methods* 293: 162–168, 2018.
- 613 **Grandjean J, Quoilin C, Duque J.** Investigating the effect of anticipating a startling acoustic  
614 stimulus on preparatory inhibition. *Neurophysiol Clin* 49: 137–147, 2019.
- 615 **Greenhouse I, Sias a., Labruna L, Ivry RB.** Nonspecific Inhibition of the Motor System  
616 during Response Preparation. *J Neurosci* 35: 10675–10684, 2015.
- 617 **Greenhouse XI, King XM, Noah XS, Maddock XRJ, Ivry RB.** Individual Differences in  
618 Resting Corticospinal Excitability Are Correlated with Reaction Time and GABA Content in  
619 Motor Cortex. *J Neurosci* 37: 2686–2696, 2017.
- 620 **Haith AM, Pakpoor J, Krakauer JW.** Independence of Movement Preparation and Movement  
621 Initiation. *J Neurosci* 36: 3007–3015, 2016.
- 622 **Hanajima R, Ugawa Y, Machii K, Mochizuki H, Terao Y, Enomoto H, Furubayashi T,**  
623 **Shiio Y, Uesugi H, Kanazawa I.** Interhemispheric facilitation of the hand motor area in humans.  
624 *J Physiol* 531: 849–859, 2001.
- 625 **Hannah R, Cavanagh SE, Tremblay S, Simeoni S, Rothwell JC.** Selective suppression of  
626 local interneuron circuits in human motor cortex contributes to movement preparation. *J Neurosci*  
627 38: 2869–17, 2018.
- 628 **Hasbroucq T, Kaneko H, Akamatsu M, Possamai CA.** Preparatory inhibition of cortico-spinal  
629 excitability: A transcranial magnetic stimulation study in man. *Cogn Brain Res* 5: 185–192, 1997.
- 630 **Hasegawa M, Majima K, Itokazu T, Maki T, Albrecht UR, Castner N, Izumo M, Sohya K,**  
631 **Sato TK, Kamitani Y, Sato TR.** Selective Suppression of Local Circuits during Movement  
632 Preparation in the Mouse Motor Cortex. *Cell Rep* 18: 2676–2686, 2017.
- 633 **Kastner S, Pinsk MA, De Weerd P, Desimone R, Ungerleider LG.** Increased Activity in

- 634 Human Visual Cortex during Directed Attention in the Absence of Visual Stimulation. *Neuron*  
635 22: 751–761, 1999.
- 636 **Kastner S, De Weerd P, Desimone R, Ungerleider LG.** Mechanisms of Directed Attention in  
637 the Human Extrastriate Cortex as Revealed by Functional MRI. *Science (80- )* 282: 108–111,  
638 1998.
- 639 **Klein PA, Petitjean C, Olivier E, Duque J.** Top-down suppression of incompatible motor  
640 activations during response selection under conflict. *Neuroimage* 86: 138–149, 2014.
- 641 **Krakauer JW, Ghilardi MF, Mentis M, Barnes A, Veytsman M, Eidelberg D, Ghez C.**  
642 Differential Cortical and Subcortical Activations in Learning Rotations and Gains for Reaching:  
643 A PET Study. *J Neurophysiol* 91: 924–933, 2004.
- 644 **Krakauer JW, Hadjiosif AM, Xu J, Wong AL, Haith AM.** Motor Learning. 9: 613–663, 2019.
- 645 **Labruna L, Fernández-Del-Olmo M, Ivry RB.** Comparison of different baseline conditions in  
646 evaluating factors that influence motor cortex excitability. *Brain Stimul* 4: 152–155, 2011.
- 647 **Makino H, Ren C, Liu H, Kim AN, Kondapaneni N, Liu X, Kuzum D, Komiyama T.**  
648 Transformation of Cortex-wide Emergent Properties during Motor Learning. *Neuron* 94: 880-  
649 890.e8, 2017.
- 650 **Mandelblat-cerf Y, Paz R, Vaadia E.** Trial-to-Trial Variability of Single Cells in Motor  
651 Cortices Is Dynamically Modified during Visuomotor Adaptation. *J Neurosci* 29: 15053–15062,  
652 2009.
- 653 **Mawase F, Lopez D, Celnik PA, Haith AM.** Movement Repetition Facilitates Response  
654 Preparation. *Cell Rep* 24: 801–808, 2018.
- 655 **Mawase F, Uehara S, Bastian AJ, Celnik P.** Motor Learning Enhances Use-Dependent  
656 Plasticity. *J Neurosci* 37: 2673–2685, 2017.
- 657 **Mure H, Tang CC, Argyelan M, Ghilardi MF, Kaplitt MG, Dhawan V, Eidelberg D.**  
658 Improved sequence learning with subthalamic nucleus deep brain stimulation: Evidence for  
659 treatment-specific network modulation. *J Neurosci* 32: 2804–2813, 2012.
- 660 **Oldfield RC.** The assessment and analysis of handedness: The Edinburgh inventory.  
661 *Neuropsychologia* 9: 97–113, 1971.
- 662 **Pascual-Leone A, Nguyet D, Cohen LG, Brasil-Neto JP, Cammarota A, Hallett M, Nguyen**

- 663 **KT, Cohen a D, Brasil-Neto JP, Cammarota A, Hallett M, Nguyet D, Cohen LG, Brasil-**  
664 **Neto JP, Cammarota A, Hallett M, Cohen G, Cammarota A, Pascual-Leone A, Nguyet D,**  
665 **Cohen LG, Brasil-Neto JP, Hallett M, Cammarota A, Hallett M, Cohen G, Cammarota A,**  
666 **Pascual-Leone A, Nguyet D, Cohen LG, Brasil-Neto JP, Hallett M.** Modulation of muscle  
667 responses evoked by transcranial magnetic stimulation during the acquisition of new fine motor  
668 skills. [Online]. *J Neurophysiol* 74: 1037–1045,  
669 1995<http://www.ncbi.nlm.nih.gov/pubmed/7500130>.
- 670 **Paz R, Boraud T, Natan C, Bergman H, Vaadia E.** Preparatory activity in motor cortex  
671 reflects learning of local visuomotor skills. *6*: 882–890, 2003.
- 672 **Pearson K, Filon L.** VII. Mathematical contributions to the theory of evolution.— IV. On the  
673 probable errors of frequency constants and on the influence of random selection on variation and  
674 correlation. *Philos Trans R Soc London* 191: 229–311, 1898.
- 675 **Quoilin C, Fievez F, Duque J.** Preparatory inhibition: Impact of choice in reaction time tasks.  
676 *Neuropsychologia* 129: 212–222, 2019.
- 677 **Quoilin C, Lambert J, Jacob B, Klein PA, Duque J.** Comparison of motor inhibition in  
678 variants of the instructed-delay choice reaction time task. *PLoS One* 11: 1–16, 2016.
- 679 **Quoilin C, Wilhelm E, Maurage P, Timary P De, Duque J.** Deficient inhibition in alcohol-  
680 dependence : let’s consider the role of the motor system ! *Neuropsychopharmacology* 0–8, 2018.
- 681 **Reis J, Swayne OB, Vandermeeren Y, Camus M, Dimyan MA, Harris-Love M, Perez MA,**  
682 **Ragert P, Rothwell JC, Cohen LG.** Contribution of transcranial magnetic stimulation to the  
683 understanding of cortical mechanisms involved in motor control. *J Physiol* 586: 325–351, 2008.
- 684 **Rosenkranz K, Kacar A, Rothwell JC.** Differential modulation of motor cortical plasticity and  
685 excitability in early and late phases of human motor learning. *J Neurosci* 27: 12058–12066, 2007.
- 686 **Shmuelof L, Yang J, Caffo B, Mazzoni P, Krakauer JW.** The neural correlates of learned  
687 motor acuity. 971–980, 2014.
- 688 **Steele CJ, Penhune VB.** Specific increases within global decreases: A functional magnetic  
689 resonance imaging investigation of five days of motor sequence learning. *J Neurosci* 30: 8332–  
690 8341, 2010.
- 691 **Vassiliadis P.** Training\_Motor\_Preparation\_TMS [Online]. 2020.<https://osf.io/8p5wm/>.

- 692 **Vassiliadis P, Grandjean J, Derosiere G, Wilde Y De.** Using a Double-Coil TMS Protocol to  
693 Assess Preparatory Inhibition Bilaterally. *Front Neurosci* 12: 1–14, 2018.
- 694 **Vyas S, Even-Chen N, Stavisky SD, Ryu SI, Nuyujukian P, Shenoy K V.** Neural Population  
695 Dynamics Underlying Motor Learning Transfer. *Neuron* 97: 1177-1186.e3, 2018.
- 696 **Vyas S, O’Shea DJ, Ryu SI, Shenoy K.** Causal role of motor preparation during error-driven  
697 learning. *Neuron* 1–11, 2020.
- 698 **Wenger E, Kühn S, Verrel J, Mårtensson J, Bodammer NC, Lindenberger U, Lövdén M.**  
699 Repeated Structural Imaging Reveals Nonlinear Progression of Experience-Dependent Volume  
700 Changes in Human Motor Cortex. *Cereb Cortex* 27: 2911–2925, 2017.
- 701 **Wiestler T, Diedrichsen J.** Skill learning strengthens cortical representations of motor  
702 sequences. *Elife* 2013: 1–20, 2013.
- 703 **Yokoi A, Diedrichsen J.** Neural Organization of Hierarchical Motor Sequence Representations  
704 in the Human Neocortex. *Neuron* 103: 1178-1190.e7, 2019.
- 705
